# Supplementary material for: A strategy involving the use of 3D self-supporting B·N co-doped carbon nanofiber composite solid polymer electrolytes to stabilize the interface between polymer electrolytes and lithium metal
Source: Royal Society of Chemistry journal article supplement (doi:10.1039/d4cp02522a), 2024-01-01
Supplement: d4cp02522a1.pdf [file d4cp02522a1.pdf]

**Figure S1.** Impedance spectra with different temperature from 25 to 70 °C for (a) PEO/LiTFSI/SN (b) PEO/LiTFSI/SN@(B.N-CNF), with (c) activation energy  $E_a$ , and (d) TGA curves for the samples of PEO/LiTFSI/SN@(B.N-CNF), PEO/LiTFSI/SN, and PEO/LiTFSI.

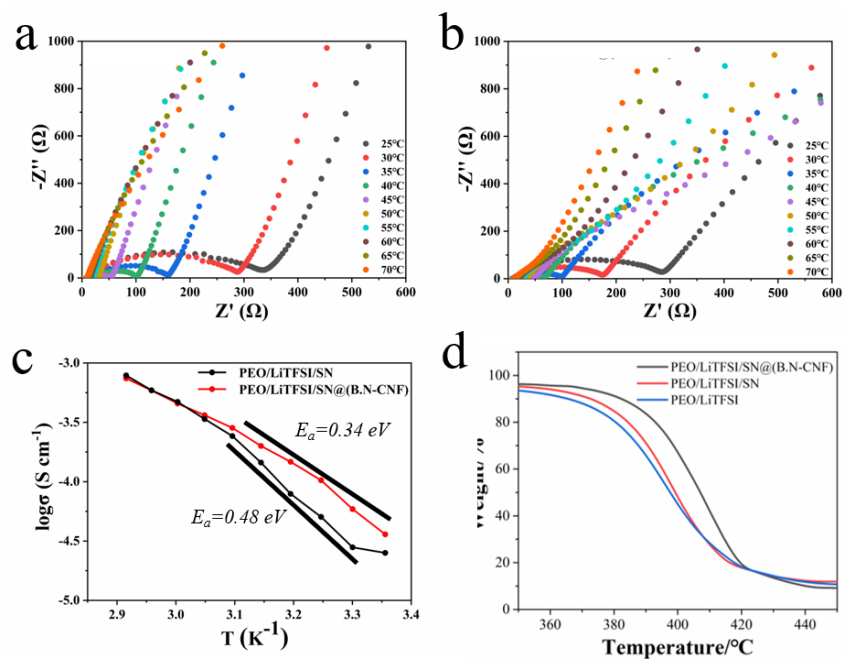

**Figure S2.** DC test for (a) PEO/LiTFSI and (b) PEO/LiTFSI/SN.

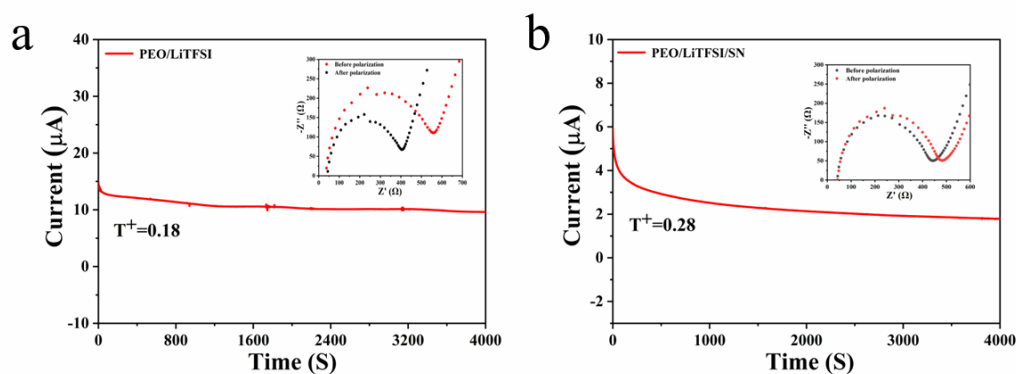

**Figure S3** Bar chart comparing the galvanostatic cycling performance based on PEO with the reported literatures.

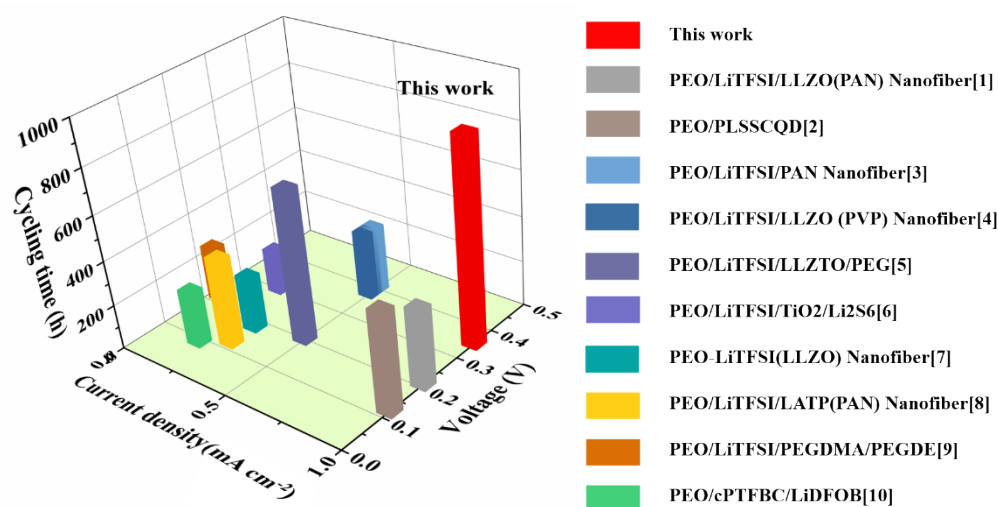

- [1] K. K. Fu, Y. Gong, J. Dai, A. Gong, X. Han, Y. Yao, C. Wang, Y. Wang, Y. Chen, C. Yan, Y. Li, E. D. Wachsman, L. Hu, Flexible, solid-state, ion-conducting membrane with 3D garnet nanofiber networks for lithium batteries, *Proc. Natl. Acad. Sci. USA* 113 (2016) 7094.
- [2] Z. Li, F. Liu, S. Chen, F. Zhai, Y. Li, Y. Feng, W. Feng, Single Li ion conducting solid-state polymer electrolytes based on carbon quantum dots for Li-metal batteries, *Nano Energy* 82 (2021) 105698.
- [3] Y. Ma, J. Wan, Y. Yang, Y. Ye, X. Xiao, D. T. Boyle, W. Burke, Z. Huang, H. Chen, Y. Cui, Z. Yu, S. T. Oyakhire, Y. Cui, Scalable, ultrathin, and high-temperature-resistant solid polymer electrolytes for energy-dense lithium metal batteries, *Adv. Energy Mater.* 12 (2022) 2103720.
- [4] Z. Wan, D. Lei, W. Yang, C. Liu, K. Shi, X. Hao, L. Shen, W. Lv, B. Li, Q. Yang, F. Kang, Y. He, Low resistance-integrated all-solid-state battery achieved by Li<sub>7</sub>La<sub>3</sub>Zr<sub>2</sub>O<sub>12</sub> nanowire upgrading polyethylene oxide (PEO) composite electrolyte and PEO cathode binder, *Adv. Funct. Mater.* 29 (2018) 1805301.
- [5] L. Chen, Y. Li, S. P. Li, L. Z. Fan, CW Nan, J. B. Goodenough, PEO/garnet composite electrolytes for solid-state lithium batteries: From “ceramic-in-polymer” to “polymer-in-ceramic”, *Nano Energy* 46 (2018) 176-184.
- [6] R. Fang, B. Xu, N. S. Grundish, Y. Xia, Y. Li, C. Lu, Y. Liu, N. Wu, J. B. Goodenough, Li<sub>2</sub>S<sub>6</sub>-Integrated PEO-based polymer electrolytes for all-solid-state lithium-metal batteries, *Angew. Chem. Int. Ed.* 60 (2021) 2-8.
- [7] Z. Guo, Y. Pang, S. Xia, F. Xu, J. Yang, L. Sun, S. Zheng, Uniform and anisotropic solid electrolyte membrane enables superior solid-state Li metal batteries, *Adv. Sci.* 8 (2021) 2100899.
- [8] D. Li, L. Chen, T. Wang, L. Z. Fan, 3D fiber-network-reinforced bicontinuous composite solid electrolyte for dendrite-free lithium metal batteries, *ACS Appl. Mater. Interfaces* 10 (2018) 7069.
- [9] Y. H. Zhang, W. Lu, L. N. Cong, J. Liu, L. Q. Sun, A. Mauger, C. M. Julien, H. M. Xie, J. Liu, Cross-linking network based on Poly(ethylene oxide): Solid polymer electrolyte for room temperature lithium battery, *J. Power Sources* 2019, 420, 63-72.
- [10] Q. Wang, X. Liu, Z. Cui, X. Shangguan, H. Zhang, J. Zhang, K. Tang, L. Li, X. Zhou, G. Cui, A fluorinated polycarbonate based all solid state polymer electrolyte for lithium metal batteries, *Electrochim. Acta* 337 (2020) 135843.



**Table S1** Comparing the performance of ASSBs with PEO-based SSEs versus the reported literatures.

| SSEs                               | Rate performance (60 °C) |              |              |            |            | Cycling performance (60 °C) |              |            |              |      |
|------------------------------------|--------------------------|--------------|--------------|------------|------------|-----------------------------|--------------|------------|--------------|------|
|                                    | 0.1C                     | 0.2C         | 0.5C         | 1C         | 2C         | Rate                        | 1st          | Cycles     | Retention    | Refs |
| PEO/LiTFSI/<br>Ca-CeO <sub>2</sub> | 165                      | 158          | 145          | 121        | 98         | 1C                          | 126          | 100        | 74%          | 1    |
| PEO@GF                             | 158                      | 154          | 106          | 46         | 7          | 0.2C                        | 142          | 100        | 91.5%        | 2    |
| PEO/LiTFSI/LATP/PA<br>N            | ---                      | 144          | 130          | 119        | 90         | 0.2C                        | 144          | 100        | ---          | 3    |
| PEO/LiTFSI/PAN                     | 155.9                    | 154.3        | 145.3        | 98.7       | 41.5       | 0.5C                        | 165.3        | 100        | 84.2%        | 4    |
| PEO/PLSSCQD                        | 168                      | 158          | 140          | 133        | 124        | 0.2C                        | 155.9        | 100        | 94.3%        | 5    |
| PEO/LiTFSI/PA6                     | ---                      | 162          | 150          | 138        | 127        | 1C                          | 130          | 100        | 91.5%        | 6    |
| PEO/LiTFSI/LATP                    | 150                      | 146          | 130          | 108        | ---        | 0.1C                        | 148          | 100        | 91.8%        | 7    |
| PEO/<br>LiTFSI/LLZTO/PEG           | 150                      | 149          | 137          | 125        | 107        | 0.2C                        | 150          | 100        | 92%          | 8    |
| <b>This work</b>                   | <b>159.1</b>             | <b>156.4</b> | <b>148.2</b> | <b>138</b> | <b>120</b> | <b>0.2C</b>                 | <b>150.3</b> | <b>100</b> | <b>96.9%</b> |      |

- [1] H. Chen, D. Adekoya, L. Hencz, J. Ma, S. Chen, C. Yan, H. Zhao, G. Cui, S. Zhang, Stable seamless interfaces and rapid ionic conductivity of Ca–CeO<sub>2</sub>/LiTFSI/PEO composite electrolyte for high-rate and high-voltage all-solid-state battery, *Adv. Energy Mater.* 10 (2020) 2000049.
- [2] X. Yang, Q. Sun, C. Zhao, X. Gao, K. R. Adair, Y. Liu, J. Luo, X. Lin, Ji. Liang, H. Huang, L. Zhang, R. Yang, S. Lu, R. Li, X. Sun, High-areal-capacity all-solid-state lithium batteries enabled by rational design of fast ion transport channels in vertically-aligned composite polymer electrodes, *Nano Energy* 61 (2019) 567-575.
- [3] D. Li, L. Chen, T. Wang, L. Z. Fan, 3D fiber-network-reinforced bicontinuous composite solid electrolyte for dendrite-free lithium metal batteries, *ACS Appl. Mater. Interfaces* 10 (2018) 7069.
- [4] Y. Ma, J. Wan, Y. Yang, Y. Ye, X. Xiao, D. T. Boyle, W. Burke, Z. Huang, H. Chen, Y. Cui, Z. Yu, S. T. Oyakhire, Y. Cui, Scalable, ultrathin, and high-temperature-resistant solid polymer electrolytes for energy-dense lithium metal batteries, *Adv. Energy Mater.* 12 (2022) 2103720.
- [5] Z. Li, F. Liu, S. Chen, F. Zhai, Y. Li, Y. Feng, W. Feng, Single Li ion conducting solid-state polymer electrolytes based on carbon quantum dots for Li-metal batteries, *Nano Energy* 82 (2021) 105698.
- [6] L. Gao, J. Li, J. Ju, B. Cheng, W. Kang, N. Deng, High-performance all-solid-state polymer electrolyte with fast conductivity pathway formed by hierarchical structure polyamide 6 nanofiber for lithium metal battery, *J. Energy Chem.* 54 (2021) 644.

- [7] Y. Huang, Z. Zhang, H. Gao, J. Huang, C. Li,  $\text{Li}_{1.5}\text{Al}_{0.5}\text{Ti}_{1.5}(\text{PO}_4)_3$  enhanced polyethylene oxide polymer electrolyte for all-solid-state lithium batteries, *Solid State Ionics* 356 (2020) 115437.
- [8] L. Chen, Y. Li, S. P. Li, L. Z. Fan, CW Nan, J. B. Goodenough, PEO/garnet composite electrolytes for solid-state lithium batteries: From “ceramic-in-polymer” to “polymer-in-ceramic”, *Nano Energy* 46 (2018) 176-184.
